# Supplementary material
Source: MDPI journal article supplement (https://www.mdpi.com/2073-4395/12/12/3230)
Supplement: s1 [file s1]

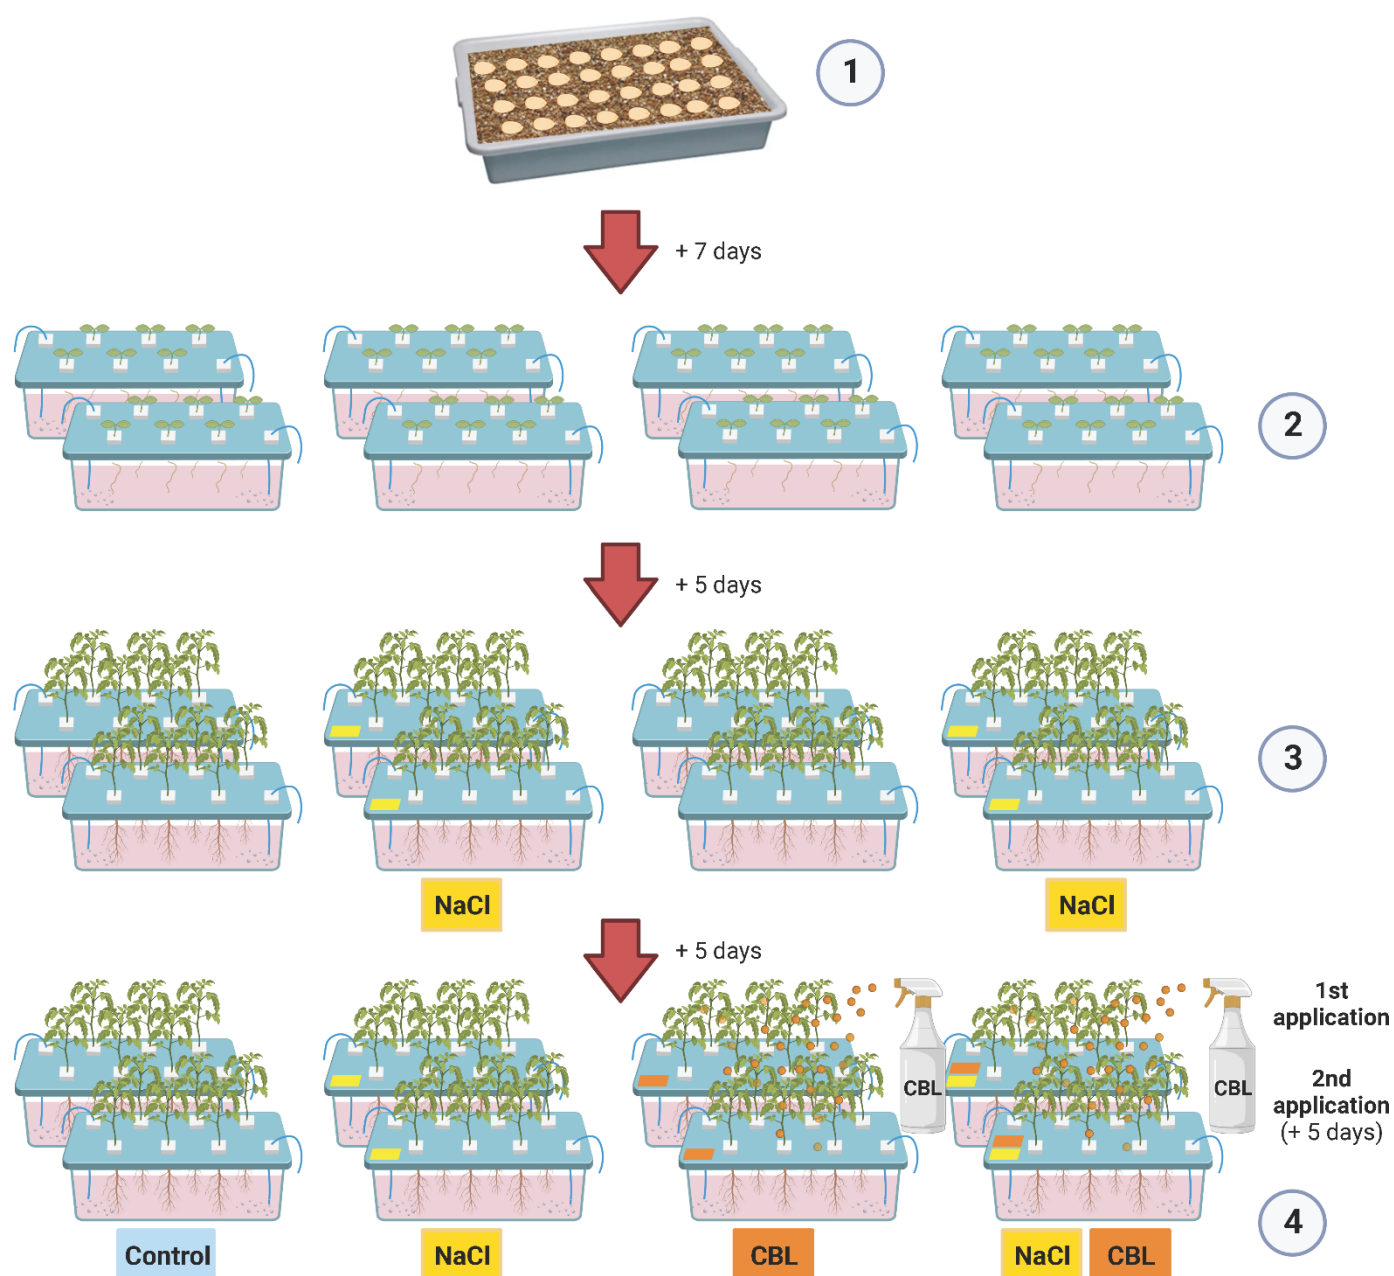

**Figure S1.** Experimental design and growth stages of the tomato plants: **(1)** germination of the seeds in vermiculite; **(2)** after 5 days, small plants were transferred to 16-L containers filled with Hoagland's solution (6 plants each) and continued growing in hydroponic conditions; **(3)** 5 days later, 60 mM NaCl was added to the Hoagland's solution in 4 of the 8 containers; **(4)** After 10 days of growing in hydroponic culture (5 days after the treatment of NaCl), CBL was foliar sprayed for the first time to half of the containers (two of control conditions and two of the NaCl-treated plants). 5 days later, it was performed a second application of CBL to the same plants as the previous one. After 3 days from the second foliar treatment (15 days of hydroponic culture), samples were collected and measurements were performed.

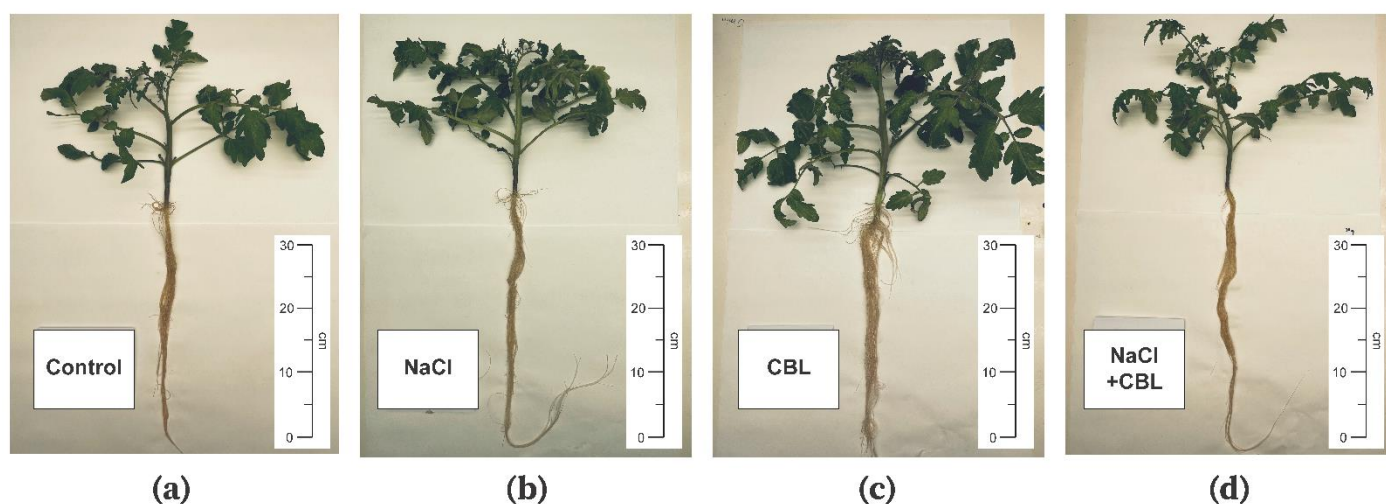

**Figure S2.** Comparison of the growth of whole tomato plants under the different growth conditions: **(a)** Control; **(b)** salinity (NaCl); **(c)** CBL; **(d)** combination of salinity and CBL (NaCl+CBL). The photographs were taken on the harvest day.

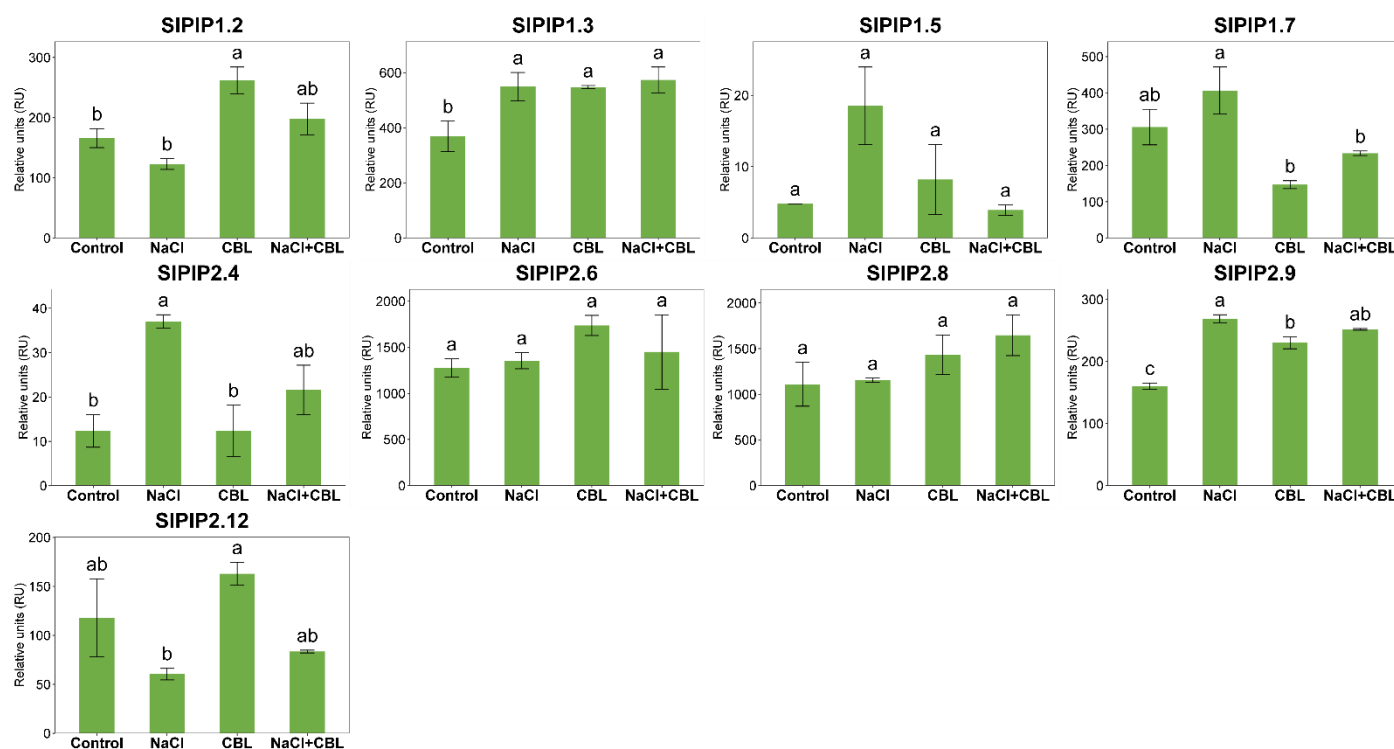

**Figure S3.** Relative expression of PIPs isoforms in tomato plants. Each bar represents the mean of 3 middle leaves mix from 3 different plants. Columns with different letters differ significantly according to Duncan's test ( $p \leq 0.05$ ). Outliers values were identified and excluded using the Rosner's test ( $p \leq 0.05$ ).

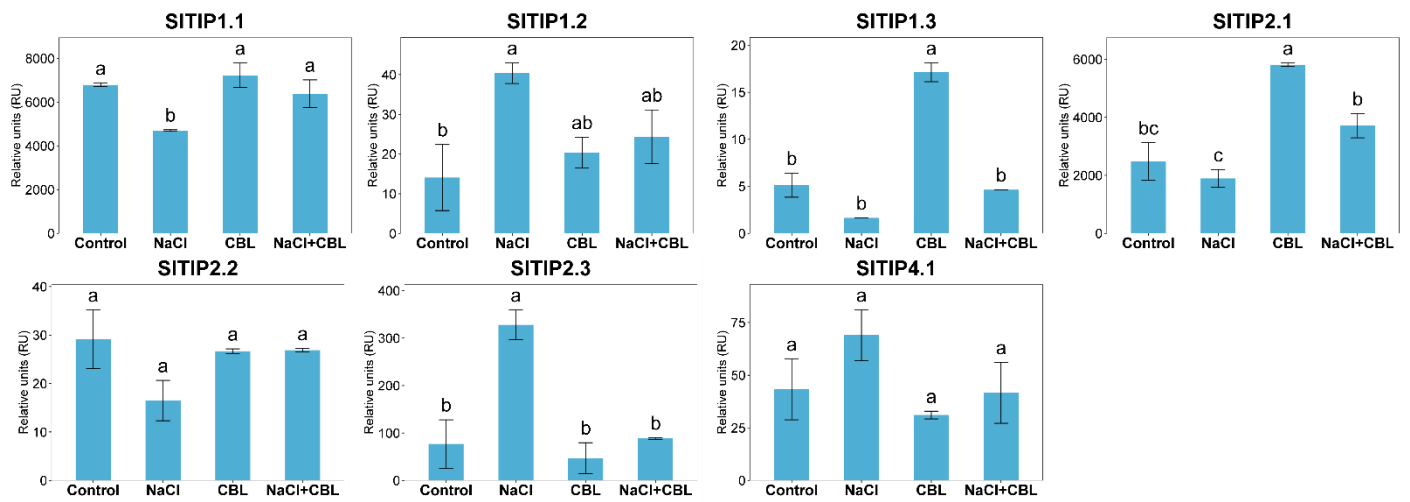

**Figure S4.** Relative expression of TIPs isoforms in tomato plants. Each bar represents the mean of 3 middle leaves mix from 3 different plants. Columns with different letters differ significantly according to Duncan's test ( $p \leq 0.05$ ). Outliers values were identified and excluded using the Rosner's test ( $p \leq 0.05$ ).

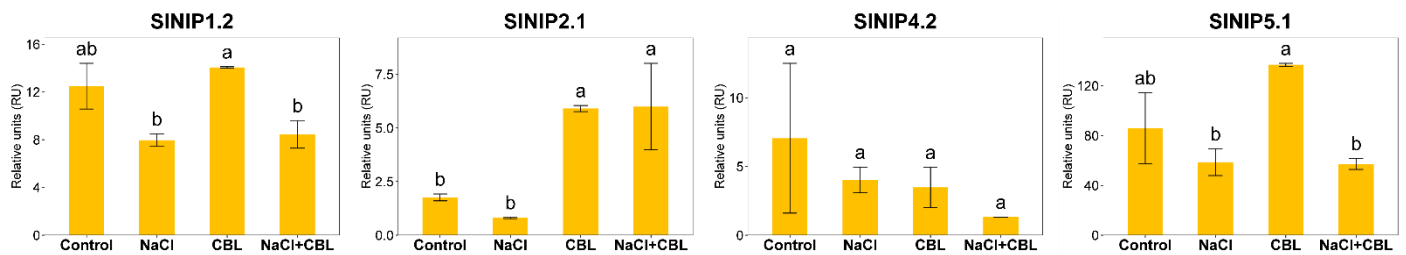

**Figure S5.** Relative expression of NIPs isoforms in tomato plants. Each bar represents the mean of 3 middle leaves mix from 3 different plants. Columns with different letters differ significantly according to Duncan's test ( $p \leq 0.05$ ). Outliers values were identified and excluded using the Rosner's test ( $p \leq 0.05$ ).

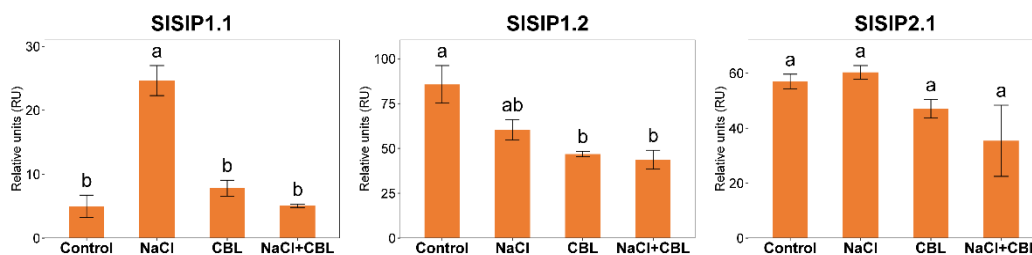

**Figure S6.** Relative expression of SIPs isoforms in tomato plants. Each bar represents the mean of 3 middle leaves mix from 3 different plants. Columns with different letters differ significantly according to Duncan's test ( $p \leq 0.05$ ). Outliers values were identified and excluded using the Rosner's test ( $p \leq 0.05$ ).

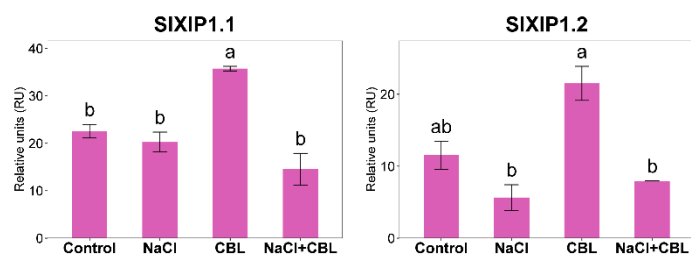

**Figure S7.** Relative expression of XIPs isoforms in tomato plants. Each bar represents the mean of 3 middle leaves mix from 3 different plants. Columns with different letters differ significantly according to Duncan's test ( $p \leq 0.05$ ). Outliers values were identified and excluded using the Rosner's test ( $p \leq 0.05$ ).
